# Supplementary material for: A scientific note on seasonal levels of pesticide residues in honey bee worker tissues
Source: Springer Nature journal article supplement (doi:10.1007/s13592-016-0455-5), 2016-07-19
Supplement: MOESM1 [file 13592_2016_455_MOESM1_ESM.pdf]

**A scientific note on seasonal levels of pesticide residues in honey bee worker tissues**

\*Natalie K. Boyle, Walter S. Sheppard

\* Corresponding author:

Address: Department of Entomology, Washington State University, FSHN 166, Pullman, WA, 99164

email: [natboyle87@gmail.com](mailto:natboyle87@gmail.com)

**Table I. Pesticide residue analysis of honey bee worker tissue and brood comb wax samples and collected from migratory beekeeping equipment.** Wax was analyzed for a spectrum of 172 pesticides in May 2010. ‘Percent detection in tissue’ indicates the percentage of colonies in which residues were discovered in October 2010 and/or March 2011 worker tissue samples. Only pesticides that were confirmed as present in the brood comb are reported in this table.

| <b>Pesticide</b>      | <b>Class</b>       | <b>Use</b>  | <b><math>\bar{x}</math> wax, <math>\mu\text{g}/\text{kg}</math><br/>(SE)</b> | <b>% Detection<br/>in wax</b> | <b>% Detection<br/>in tissue</b> | <b>LOD<sup>a</sup><br/><math>\mu\text{g}/\text{kg}</math></b> |
|-----------------------|--------------------|-------------|------------------------------------------------------------------------------|-------------------------------|----------------------------------|---------------------------------------------------------------|
| Fluvalinate           | Pyrethroid         | Miticide    | 9560 (809)                                                                   | 100                           | 100                              | 1.0                                                           |
| Coumaphos             | Organophosphate    | Miticide    | 459 (77)                                                                     | 100                           | 18                               | 1.0                                                           |
| Fenpyroximate         | Pyrazol            | Miticide    | 554 (36)                                                                     | 100                           | 9                                | 5.0                                                           |
| Cyprodinil            | Anilinopyrimidine  | Fungicide   | 1(0)                                                                         | 100                           | 9                                | 1.0                                                           |
| Thymol                | Monoterpene phenyl | Miticide    | 25900 (923)                                                                  | 100                           | N.D. <sup>c</sup>                | 50                                                            |
| Coumaphos oxon        | Metabolite         | —           | 54.9 (8)                                                                     | 100                           | N.D.                             | 5.0                                                           |
| 2,4-DMPF <sup>b</sup> | Metabolite         | —           | 259 (36)                                                                     | 100                           | N.D.                             | 4.0                                                           |
| Pyraclostrobin        | Strobin            | Fungicide   | 1 (0)                                                                        | 100                           | N.D.                             | 2.0                                                           |
| Chlorferone           | Metabolite         | —           | 497 (53)                                                                     | 100                           | N.D.                             | 50                                                            |
| Carbendazim (MBC)     | Benzimidazole      | Fungicide   | 5 (2.1)                                                                      | 100                           | N.D.                             | 5.0                                                           |
| Chlorpyrifos          | Organophosphate    | Insecticide | 8 (1.2)                                                                      | 91                            | N.D.                             | 1.0                                                           |
| Oxyfluorofen          | Diphenyl ether     | Herbicide   | 3 (0.7)                                                                      | 73                            | N.D.                             | 1.0                                                           |
| Azoxystrobin          | Strobin            | Fungicide   | 8 (2)                                                                        | 64                            | N.D.                             | 2.0                                                           |
| Endosulfan I          | Organochlorine     | Insecticide | 2.6 (0.7)                                                                    | 64                            | N.D.                             | 2.0                                                           |
| Chlorothalonil        | Organochlorine     | Fungicide   | 21 (12)                                                                      | 27                            | N.D.                             | 1.0                                                           |
| Endosulfan II         | Organochlorine     | Insecticide | 0.5 (0.5)                                                                    | 9                             | N.D.                             | 2.0                                                           |
| Vinclozolin           | Dicarboximide      | Fungicide   | 0.09 (0.09)                                                                  | 9                             | N.D.                             | 1.0                                                           |

<sup>a</sup> Limit of detection

<sup>b</sup> 2,4-Dimethylphenylformamide

<sup>c</sup> Not detected
